# Supplementary material for: Genomic surveillance of SARS-CoV-2 in a university community: insights into tracking variants, transmission, and spread of Gamma (P.1) variant
Source: bioRxiv or medRxiv preprint supplement (doi:10.1101/2022.02.25.22271521), 2022-02-28
Supplement: Supplementary file [file media-1.pdf]

## Supplementary Tables and Figures

**Supplementary Table 1.** Discrete geographic state analysis with PS differences for all states

| State         | N   | Two State        |                   | Three State      |                 | PS3 – PS2 |
|---------------|-----|------------------|-------------------|------------------|-----------------|-----------|
|               |     | PS2              | MC (Purdue+State) | PS3              | MC (State)      |           |
| Alabama       | 1   | 11.00 (11 – 11)  | 3.25 (3 – 5)      | 11.00 (11 – 11)  | 1.00 (1 – 1)    | 0.00      |
| Alaska        | 4   | 13.16 (12 – 14)  | 3.25 (3 – 5)      | 13.16 (12 – 14)  | 1.71 (1 – 2)    | 0.00      |
| Arizona       | 3   | 13.00 (13 – 13)  | 3.25 (3 – 5)      | 13.00 (13 – 13)  | 1.00 (1 – 1)    | 0.00      |
| Arkansas      | 1   | 11.00 (11 – 11)  | 3.25 (3 – 5)      | 11.00 (11 – 11)  | 1.00 (1 – 1)    | 0.00      |
| California    | 82  | 60.11 (56 – 64)  | 6.05 (3 – 11)     | 60.11 (56 – 64)  | 6.01 (3 – 11)   | 0.00      |
| Colorado      | 3   | 12.11 (12 – 13)  | 3.25 (3 – 5)      | 12.11 (12 – 13)  | 1.89 (1 – 2)    | 0.00      |
| Connecticut   | 3   | 12.92 (12 – 13)  | 3.25 (3 – 5)      | 12.92 (12 – 13)  | 1.08 (1 – 2)    | 0.00      |
| Delaware      | 1   | 11.00 (11 – 11)  | 3.25 (3 – 5)      | 11.00 (11 – 11)  | 1.00 (1 – 1)    | 0.00      |
| Florida       | 78  | 69.77 (66 – 73)  | 7.57 (4 – 9)      | 69.80 (66 – 73)  | 7.55 (4 – 9)    | 0.03      |
| Georgia       | 11  | 20.84 (20 – 21)  | 3.25 (3 – 5)      | 20.86 (20 – 21)  | 1.13 (1 – 2)    | 0.02      |
| Hawaii        | 3   | 12.93 (12 – 13)  | 3.25 (3 – 5)      | 12.93 (12 – 13)  | 1.06 (1 – 2)    | 0.00      |
| Idaho         | 4   | 13.82 (13 – 14)  | 3.25 (3 – 5)      | 13.82 (13 – 14)  | 1.17 (1 – 2)    | 0.00      |
| Illinois      | 212 | 94.70 (89 – 100) | 13.80 (12 – 17)   | 99.18 (94 – 104) | 13.80 (12 – 17) | 4.48      |
| Indiana       | 36  | 27.41 (26 – 29)  | 11.00 (11 – 11)   | 30.19 (28 – 32)  | 6.09 (6 – 7)    | 2.78      |
| Iowa          | 2   | 11.98 (12 – 12)  | 3.25 (3 – 5)      | 11.98 (12 – 12)  | 1.018 (1 – 1)   | 0.00      |
| Kansas        | 5   | 14.86 (14 – 15)  | 3.25 (3 – 5)      | 14.86 (14 – 15)  | 1.13 (1 – 2)    | 0.00      |
| Kentucky      | 1   | 11.00 (11 – 11)  | 3.25 (3 – 5)      | 11.00 (11 – 11)  | 1.00 (1 – 1)    | 0.00      |
| Maryland      | 3   | 12.98 (13 – 13)  | 3.25 (3 – 5)      | 13.00 (13 – 13)  | 1.00 (1 – 1)    | 0.02      |
| Massachusetts | 29  | 33.53 (31 – 36)  | 3.64 (3 – 5)      | 33.53 (31 – 36)  | 3.22 (2 – 5)    | 0.00      |
| Michigan      | 14  | 21.75 (21 – 22)  | 3.41 (3 – 5)      | 21.77 (21 – 22)  | 3.17 (3 – 4)    | 0.00      |

|                |    |                 |              |                 |              |      |
|----------------|----|-----------------|--------------|-----------------|--------------|------|
| Minnesota      | 23 | 32.06 (30 – 33) | 3.26 (3 – 5) | 32.08 (30 – 33) | 1.61 (1 – 2) | 0.02 |
| Nebraska       | 4  | 13.90 (13 – 14) | 3.30 (3 – 5) | 13.97 (14 – 14) | 1.03 (1 – 1) | 0.07 |
| Nevada         | 2  | 11.98 (12 – 12) | 3.25 (3 – 5) | 11.98 (12 – 12) | 1.02 (1 – 1) | 0.00 |
| New Hampshire  | 1  | 11.00 (11 – 11) | 3.25 (3 – 5) | 11.00 (11 – 11) | 1.00 (1 – 1) | 0.00 |
| New Jersey     | 7  | 16.89 (16 – 17) | 3.25 (3 – 5) | 16.94 (16 – 17) | 1.06 (1 – 2) | 0.05 |
| New Mexico     | 1  | 11.00 (11 – 11) | 3.25 (3 – 5) | 11.00 (11 – 11) | 1.00 (1 – 1) | 0.00 |
| New York       | 27 | 30.80 (28 – 33) | 3.39 (3 – 5) | 31.60 (29 – 34) | 2.63 (2 – 4) | 0.80 |
| North Carolina | 4  | 13.97 (14 – 14) | 3.25 (3 – 5) | 13.97 (14 – 14) | 1.02 (1 – 1) | 0.00 |
| Ohio           | 23 | 28.84 (26 – 31) | 3.34 (3 – 5) | 28.84 (26 – 31) | 2.43 (2 – 4) | 0.00 |
| Oregon         | 2  | 12.00 (12 – 12) | 3.25 (3 – 5) | 12.00 (12 – 12) | 1.00 (1 – 1) | 0.00 |
| Pennsylvania   | 11 | 19.94 (19 – 20) | 3.25 (3 – 5) | 19.94 (19 – 20) | 2.01 (2 – 2) | 0.00 |
| Rhode Island   | 4  | 14.00 (14 – 14) | 3.25 (3 – 5) | 14.00 (14 – 14) | 1.00 (1 – 1) | 0.00 |
| South Carolina | 10 | 19.46 (18 – 20) | 3.25 (3 – 5) | 19.46 (18 – 20) | 1.45 (1 – 1) | 0.00 |
| Tennessee      | 7  | 13.98 (14 – 14) | 4.09 (4 – 5) | 13.98 (14 – 14) | 4.01 (4 – 4) | 0.00 |
| Texas          | 27 | 31.67 (29 – 34) | 3.62 (3 – 5) | 31.84 (29 – 34) | 2.82 (2 – 5) | 0.17 |
| Vermont        | 1  | 11.00 (11 – 11) | 3.25 (3 – 5) | 11.00 (11 – 11) | 1.00 (1 – 1) | 0.00 |
| Virginia       | 1  | 11.00 (11 – 11) | 3.25 (3 – 5) | 11.00 (11 – 11) | 1.00 (1 – 1) | 0.00 |
| Washington     | 68 | 63.81 (59 – 69) | 3.57 (3 – 5) | 64.66 (60 – 69) | 3.11 (2 – 5) | 0.83 |
| Wisconsin      | 25 | 30.54 (29 – 31) | 5.00 (5 – 5) | 30.72 (30 – 31) | 4.99 (5 – 5) | 0.18 |
| Washington, DC | 2  | 12.00 (12 – 12) | 3.25 (3 – 5) | 12.00 (12 – 12) | 1.00 (1 – 1) | 0.00 |
| Brazil         | 1  | 11.00 (11 – 11) | 3.25 (3 – 5) | 11.00 (11 – 11) | 1.00 (1 – 1) | 0.00 |
| Colombia       | 1  | 10.75 (10 – 11) | 3.25 (3 – 5) | 11.00 (11 – 11) | 1.00 (1 – 1) | 0.25 |

**Supplementary Table 2.** Dataset sample sizes, population sizes, and Bayes Factor support for migration by state

|               | Population <sup>1</sup> | Total Genomes <sup>2</sup> | Total P.1 Genomes <sup>3</sup> | Contextual P.1 Genomes <sup>4</sup> | Subsampled Contextual P.1 Genomes <sup>5</sup> | Migration Bayes Factor <sup>6</sup> |
|---------------|-------------------------|----------------------------|--------------------------------|-------------------------------------|------------------------------------------------|-------------------------------------|
| Alabama       | 5039877                 | 3640                       | 29                             | 2                                   | 1                                              | 0.47                                |
| Alaska        | 732673                  | 2636                       | 16                             | 4                                   | 4                                              | 0.44                                |
| Arizona       | 7276316                 | 23711                      | 203                            | 7                                   | 3                                              | 0.42                                |
| Arkansas      | 3025891                 | 1985                       | 16                             | 1                                   | 1                                              | 0.47                                |
| California    | 39237836                | 102988                     | 1119                           | 86                                  | 82                                             | 0.27                                |
| Colorado      | 5812069                 | 30037                      | 184                            | 13                                  | 3                                              | 0.43                                |
| Connecticut   | 3605597                 | 8485                       | 107                            | 3                                   | 3                                              | 0.43                                |
| Delaware      | 1003384                 | 2536                       | 29                             | 1                                   | 1                                              | 0.51                                |
| Florida       | 21781128                | 45773                      | 1472                           | 99                                  | 78                                             | 0.22                                |
| Georgia       | 10799566                | 8691                       | 89                             | 11                                  | 11                                             | 0.40                                |
| Hawaii        | 1441553                 | 2989                       | 38                             | 3                                   | 3                                              | 0.46                                |
| Idaho         | 1900923                 | 2748                       | 10                             | 4                                   | 4                                              | 0.47                                |
| Illinois      | 12671469                | 21708                      | 2035                           | 262                                 | 212                                            | 1165.01                             |
| Indiana       | 6805985                 | 8931                       | 336                            | 75                                  | 54                                             | 1165.01                             |
| Iowa          | 3193079                 | 1115                       | 22                             | 2                                   | 2                                              | 0.46                                |
| Kansas        | 2934582                 | 4271                       | 129                            | 7                                   | 5                                              | 0.43                                |
| Kentucky      | 4509394                 | 3139                       | 27                             | 1                                   | 1                                              | 0.47                                |
| Louisiana     | 4624047                 | 6373                       | 20                             | 0                                   | 0                                              | NA                                  |
| Maine         | 1372247                 | 5141                       | 53                             | 0                                   | 0                                              | NA                                  |
| Maryland      | 6165129                 | 15675                      | 57                             | 3                                   | 3                                              | 0.45                                |
| Massachusetts | 6984723                 | 21638                      | 1180                           | 35                                  | 29                                             | 0.35                                |
| Michigan      | 10050811                | 29428                      | 258                            | 14                                  | 14                                             | 0.32                                |

|                |          |       |      |    |    |      |
|----------------|----------|-------|------|----|----|------|
| Minnesota      | 5707390  | 27600 | 278  | 30 | 23 | 0.34 |
| Mississippi    | 2949965  | 1326  | 5    | 0  | 0  | NA   |
| Missouri       | 6168187  | 5092  | 69   | 0  | 0  | NA   |
| Montana        | 1104271  | 2223  | 8    | 0  | 0  | NA   |
| Nebraska       | 1963692  | 3218  | 21   | 5  | 4  | 0.44 |
| Nevada         | 3143991  | 6334  | 26   | 2  | 2  | 0.46 |
| New Hampshire  | 1388992  | 2350  | 62   | 1  | 1  | 0.46 |
| New Jersey     | 9267130  | 16211 | 230  | 12 | 7  | 0.40 |
| New Mexico     | 2115877  | 7190  | 30   | 3  | 1  | 0.48 |
| New York       | 19835913 | 51873 | 438  | 31 | 27 | 0.43 |
| North Carolina | 10551162 | 11885 | 82   | 4  | 4  | 0.41 |
| North Dakota   | 774948   | 3350  | 9    | 0  | 0  | NA   |
| Ohio           | 11780017 | 11168 | 190  | 26 | 23 | 0.39 |
| Oklahoma       | 3986639  | 915   | 5    | 0  | 0  | NA   |
| Oregon         | 4246155  | 12170 | 185  | 3  | 2  | 0.43 |
| Pennsylvania   | 12964056 | 18950 | 171  | 11 | 11 | 0.36 |
| Rhode Island   | 1095610  | 4352  | 148  | 7  | 4  | 0.40 |
| South Carolina | 5190705  | 4159  | 46   | 10 | 10 | 0.41 |
| South Dakota   | 895376   | 732   | 3    | 0  | 0  | NA   |
| Tennessee      | 6975218  | 5203  | 62   | 7  | 7  | 0.41 |
| Texas          | 29527941 | 63090 | 438  | 28 | 27 | 0.32 |
| Utah           | 3337975  | 19777 | 16   | 0  | 0  | NA   |
| Vermont        | 645570   | 1246  | 10   | 1  | 1  | 0.46 |
| Virginia       | 8642274  | 10300 | 46   | 2  | 1  | 0.47 |
| Washington     | 7738692  | 32903 | 1035 | 80 | 68 | 0.56 |
| West Virginia  | 1782959  | 6631  | 11   | 0  | 0  | NA   |
| Wisconsin      | 5895908  | 16916 | 179  | 33 | 25 | 0.31 |
| Wyoming        | 578803   | 13566 | 21   | 0  | 0  | NA   |

1 = estimates of 2021 state populations from the U.S. Census Bureau, <https://data.census.gov>

2 = total number of SARS-CoV-2 genomes sampled through June 2021 available on GISAID from each state

3 = total number of variant P.1/Gamma genomes sampled through June 2021 available on GISAID from each state

4 = number of variant P.1/Gamma genomes within 0-2 substitutions of Purdue available on GISAID from each state

5 = number of variant P.1/Gamma genomes by state used in phylogeographic analysis after sub-sampling all available P.1 genomes within 0-2 substitutions of Purdue genomes

6 = Bayes Factors supporting migration between each state and Purdue estimated from phylogenetic analysis of GISAID genomes closely related to Purdue P.1 samples

**Supplementary Table 3.** All 677 sequenced samples collected at Purdue University campus from January 3-May 8, 2021, included in the study with respective virus names and accession IDs after submission to GISAID

| <b>GISAID Virus Name</b>           | <b>GISAID Accession ID</b> |
|------------------------------------|----------------------------|
| hCoV-19/USA/IN-PU-82386/2021       | EPI_ISL_893214             |
| hCoV-19/USA/IN-PU-100821/2021      | EPI_ISL_891144             |
| hCoV-19/USA/IN-PU-104025/2021      | EPI_ISL_891141             |
| hCoV-19/USA/IN-PU-LH000094162/2021 | EPI_ISL_955222             |
| hCoV-19/USA/IN-PU-LH000101146/2021 | EPI_ISL_955226             |
| hCoV-19/USA/IN-PU-LH000094074/2021 | EPI_ISL_955220             |
| hCoV-19/USA/IN-PU-LH000124690/2021 | EPI_ISL_955224             |
| hCoV-19/USA/IN-PU-LH000145185/2021 | EPI_ISL_955215             |
| hCoV-19/USA/IN-PU-LH000115045/2021 | EPI_ISL_955219             |
| hCoV-19/USA/IN-PU-LH000094242/2021 | EPI_ISL_955221             |
| hCoV-19/USA/IN-PU-LH000124570/2021 | EPI_ISL_955223             |
| hCoV-19/USA/IN-PU-LH000092865/2021 | EPI_ISL_955228             |
| hCoV-19/USA/IN-PU-LH000046230/2021 | EPI_ISL_955225             |
| hCoV-19/USA/IN-PU-LH000100666/2021 | EPI_ISL_955217             |
| hCoV-19/USA/IN-PU-LH000109094/2021 | EPI_ISL_955216             |
| hCoV-19/USA/IN-PU-LH000145107/2021 | EPI_ISL_955218             |
| hCoV-19/USA/IN-PU-LH000092821/2021 | EPI_ISL_955227             |
| hCoV-19/USA/IN-PU-LH000101372/2021 | EPI_ISL_955212             |
| hCoV-19/USA/IN-PU-LH000115377/2021 | EPI_ISL_1184180            |
| hCoV-19/USA/IN-PU-LH000132511/2021 | EPI_ISL_1184177            |
| hCoV-19/USA/IN-PU-LH000121973/2021 | EPI_ISL_1184183            |
| hCoV-19/USA/IN-PU-LH000145467/2021 | EPI_ISL_1184172            |

|                                    |                 |
|------------------------------------|-----------------|
| hCoV-19/USA/IN-PU-LH000115449/2021 | EPI_ISL_1184169 |
| hCoV-19/USA/IN-PU-LH000094402/2021 | EPI_ISL_1184174 |
| hCoV-19/USA/IN-PU-LH000115260/2021 | EPI_ISL_1184170 |
| hCoV-19/USA/IN-PU-LH000145457/2021 | EPI_ISL_1184171 |
| hCoV-19/USA/IN-PU-LH000094397/2021 | EPI_ISL_1184175 |
| hCoV-19/USA/IN-PU-LH000121610/2021 | EPI_ISL_1184176 |
| hCoV-19/USA/IN-PU-LH000117345/2021 | EPI_ISL_1184178 |
| hCoV-19/USA/IN-PU-LH000014094/2021 | EPI_ISL_1184179 |
| hCoV-19/USA/IN-PU-LH000122006/2021 | EPI_ISL_1184184 |
| hCoV-19/USA/IN-PU-LH000145283/2021 | EPI_ISL_1184173 |
| hCoV-19/USA/IN-PU-LH000130674/2021 | EPI_ISL_1184199 |
| hCoV-19/USA/IN-PU-LH000130761/2021 | EPI_ISL_1184200 |
| hCoV-19/USA/IN-PU-LH000130882/2021 | EPI_ISL_1184195 |
| hCoV-19/USA/IN-PU-LH000125118/2021 | EPI_ISL_1184194 |
| hCoV-19/USA/IN-PU-LH000148197/2021 | EPI_ISL_1184196 |
| hCoV-19/USA/IN-PU-LH000128502/2021 | EPI_ISL_1184192 |
| hCoV-19/USA/IN-PU-LH000125086/2021 | EPI_ISL_1184191 |
| hCoV-19/USA/IN-PU-LH000130975/2021 | EPI_ISL_1184193 |
| hCoV-19/USA/IN-PU-LH000130952/2021 | EPI_ISL_1184197 |
| hCoV-19/USA/IN-PU-LH000125243/2021 | EPI_ISL_1184188 |
| hCoV-19/USA/IN-PU-LH000111675/2021 | EPI_ISL_1184187 |
| hCoV-19/USA/IN-PU-LH000125080/2021 | EPI_ISL_1184189 |
| hCoV-19/USA/IN-PU-LH000122049/2021 | EPI_ISL_1184185 |
| hCoV-19/USA/IN-PU-LH000122119/2021 | EPI_ISL_1184186 |
| hCoV-19/USA/IN-PU-LH000122390/2021 | EPI_ISL_1184190 |
| hCoV-19/USA/IN-PU-LH000125380/2021 | EPI_ISL_1184198 |
| hCoV-19/USA/IN-PU-LH000094305/2021 | EPI_ISL_1184201 |

|                                    |                 |
|------------------------------------|-----------------|
| hCoV-19/USA/IN-PU-LH000141747/2021 | EPI_ISL_1184202 |
| hCoV-19/USA/IN-PU-LH000130743/2021 | EPI_ISL_1184211 |
| hCoV-19/USA/IN-PU-LH000137275/2021 | EPI_ISL_1184212 |
| hCoV-19/USA/IN-PU-LH000139428/2021 | EPI_ISL_1184214 |
| hCoV-19/USA/IN-PU-LH000137122/2021 | EPI_ISL_1184215 |
| hCoV-19/USA/IN-PU-LH000134305/2021 | EPI_ISL_1184219 |
| hCoV-19/USA/IN-PU-LH000137071/2021 | EPI_ISL_1184206 |
| hCoV-19/USA/IN-PU-LH000141747/2021 | EPI_ISL_1184202 |
| hCoV-19/USA/IN-PU-LH000130761/2021 | EPI_ISL_1184200 |
| hCoV-19/USA/IN-PU-LH000128502/2021 | EPI_ISL_1184192 |
| hCoV-19/USA/IN-PU-LH000122390/2021 | EPI_ISL_1184190 |
| hCoV-19/USA/IN-PU-LH000122119/2021 | EPI_ISL_1184186 |
| hCoV-19/USA/IN-PU-LH000122049/2021 | EPI_ISL_1184185 |
| hCoV-19/USA/IN-PU-LH000130952/2021 | EPI_ISL_1184197 |
| hCoV-19/USA/IN-PU-LH000145283/2021 | EPI_ISL_1184173 |
| hCoV-19/USA/IN-PU-LH000145457/2021 | EPI_ISL_1184171 |
| hCoV-19/USA/IN-PU-LH000125380/2021 | EPI_ISL_1184198 |
| hCoV-19/USA/IN-PU-LH000145467/2021 | EPI_ISL_1184172 |
| hCoV-19/USA/IN-PU-LH000146931/2021 | EPI_ISL_1255295 |
| hCoV-19/USA/IN-PU-LH000105391/2021 | EPI_ISL_1255294 |
| hCoV-19/USA/IN-PU-LH000144809/2021 | EPI_ISL_1255290 |
| hCoV-19/USA/IN-PU-LH000144791/2021 | EPI_ISL_1255289 |
| hCoV-19/USA/IN-PU-LH000146529/2021 | EPI_ISL_1255291 |
| hCoV-19/USA/IN-PU-LH000144713/2021 | EPI_ISL_1255287 |
| hCoV-19/USA/IN-PU-LH000144689/2021 | EPI_ISL_1255286 |
| hCoV-19/USA/IN-PU-LH000144762/2021 | EPI_ISL_1255288 |
| hCoV-19/USA/IN-PU-LH00043927/2021  | EPI_ISL_1255292 |



|                                    |                 |
|------------------------------------|-----------------|
| hCoV-19/USA/IN-PU-LH000142608/2021 | EPI_ISL_1255283 |
| hCoV-19/USA/IN-PU-LH000137093/2021 | EPI_ISL_1255282 |
| hCoV-19/USA/IN-PU-LH000143108/2021 | EPI_ISL_1255284 |
| hCoV-19/USA/IN-PU-LH000129280/2021 | EPI_ISL_1255280 |
| hCoV-19/USA/IN-PU-LH000111714/2021 | EPI_ISL_1255279 |
| hCoV-19/USA/IN-PU-LH000134913/2021 | EPI_ISL_1255281 |
| hCoV-19/USA/IN-PU-LH000144595/2021 | EPI_ISL_1255285 |
| hCoV-19/USA/IN-PU-LH000084853/2021 | EPI_ISL_1255293 |
| hCoV-19/USA/IN-PU-LH000165434/2021 | EPI_ISL_1823477 |
| hCoV-19/USA/IN-PU-LH000161721/2021 | EPI_ISL_1823476 |
| hCoV-19/USA/IN-PU-LH000107081/2021 | EPI_ISL_1823441 |
| hCoV-19/USA/IN-PU-LH000136316/2021 | EPI_ISL_1823475 |
| hCoV-19/USA/IN-PU-LH000165181/2021 | EPI_ISL_1823474 |
| hCoV-19/USA/IN-PU-LH000167908/2021 | EPI_ISL_1823440 |
| hCoV-19/USA/IN-PU-LH000101815/2021 | EPI_ISL_1823420 |
| hCoV-19/USA/IN-PU-LH000136283/2021 | EPI_ISL_1823473 |
| hCoV-19/USA/IN-PU-LH000166576/2021 | EPI_ISL_1823472 |
| hCoV-19/USA/IN-PU-LH000111633/2021 | EPI_ISL_1823439 |
| hCoV-19/USA/IN-PU-LH000161602/2021 | EPI_ISL_1823471 |
| hCoV-19/USA/IN-PU-LH000111568/2021 | EPI_ISL_1823470 |
| hCoV-19/USA/IN-PU-LH000160461/2021 | EPI_ISL_1823437 |
| hCoV-19/USA/IN-PU-LH000101989/2021 | EPI_ISL_1823419 |
| hCoV-19/USA/IN-PU-LH000146820/2021 | EPI_ISL_1823410 |
| hCoV-19/USA/IN-PU-LH000161630/2021 | EPI_ISL_1823469 |
| hCoV-19/USA/IN-PU-LH000161906/2021 | EPI_ISL_1823468 |
| hCoV-19/USA/IN-PU-LH000111927/2021 | EPI_ISL_1823435 |
| hCoV-19/USA/IN-PU-LH000171261/2021 | EPI_ISL_1823525 |

|                                    |                 |
|------------------------------------|-----------------|
| hCoV-19/USA/IN-PU-LH000166844/2021 | EPI_ISL_1823524 |
| hCoV-19/USA/IN-PU-LH000166580/2021 | EPI_ISL_1823465 |
| hCoV-19/USA/IN-PU-LH000166803/2021 | EPI_ISL_1823523 |
| hCoV-19/USA/IN-PU-LH000190793/2021 | EPI_ISL_1823526 |
| hCoV-19/USA/IN-PU-LH000190839/2021 | EPI_ISL_1823527 |
| hCoV-19/USA/IN-PU-LH000162853/2021 | EPI_ISL_1823528 |
| hCoV-19/USA/IN-PU-LH000161525/2021 | EPI_ISL_1823530 |
| hCoV-19/USA/IN-PU-LH000164253/2021 | EPI_ISL_1823531 |
| hCoV-19/USA/IN-PU-LH000166801/2021 | EPI_ISL_1823533 |
| hCoV-19/USA/IN-PU-LH000165357/2021 | EPI_ISL_1823534 |
| hCoV-19/USA/IN-PU-LH000190767/2021 | EPI_ISL_1823535 |
| hCoV-19/USA/IN-PU-LH000178976/2021 | EPI_ISL_1823536 |
| hCoV-19/USA/IN-PU-LH000146817/2021 | EPI_ISL_1823537 |
| hCoV-19/USA/IN-PU-LH000190900/2021 | EPI_ISL_1823538 |
| hCoV-19/USA/IN-PU-LH000175533/2021 | EPI_ISL_1823540 |
| hCoV-19/USA/IN-PU-LH000174029/2021 | EPI_ISL_1823541 |
| hCoV-19/USA/IN-PU-LH000174011/2021 | EPI_ISL_1823542 |
| hCoV-19/USA/IN-PU-LH000189923/2021 | EPI_ISL_1823543 |
| hCoV-19/USA/IN-PU-LH000153927/2021 | EPI_ISL_1823544 |
| hCoV-19/USA/IN-PU-LH000177024/2021 | EPI_ISL_1823545 |
| hCoV-19/USA/IN-PU-LH000179039/2021 | EPI_ISL_1823546 |
| hCoV-19/USA/IN-PU-LH000189506/2021 | EPI_ISL_1823547 |
| hCoV-19/USA/IN-PU-LH000189379/2021 | EPI_ISL_1823548 |
| hCoV-19/USA/IN-PU-LH000166910/2021 | EPI_ISL_1823522 |
| hCoV-19/USA/IN-PU-LH000165869/2021 | EPI_ISL_1823463 |
| hCoV-19/USA/IN-PU-LH000128349/2021 | EPI_ISL_1823434 |
| hCoV-19/USA/IN-PU-LH000105605/2021 | EPI_ISL_1823417 |

|                                    |                 |
|------------------------------------|-----------------|
| hCoV-19/USA/IN-PU-LH000166874/2021 | EPI_ISL_1823521 |
| hCoV-19/USA/IN-PU-LH000166829/2021 | EPI_ISL_1823520 |
| hCoV-19/USA/IN-PU-LH000161674/2021 | EPI_ISL_1823462 |
| hCoV-19/USA/IN-PU-LH000166614/2021 | EPI_ISL_1823519 |
| hCoV-19/USA/IN-PU-LH000166714/2021 | EPI_ISL_1823518 |
| hCoV-19/USA/IN-PU-LH000161937/2021 | EPI_ISL_1823461 |
| hCoV-19/USA/IN-PU-LH000131612/2021 | EPI_ISL_1823433 |
| hCoV-19/USA/IN-PU-LH000161614/2021 | EPI_ISL_1823517 |
| hCoV-19/USA/IN-PU-LH000166655/2021 | EPI_ISL_1823516 |
| hCoV-19/USA/IN-PU-LH000161593/2021 | EPI_ISL_1823460 |
| hCoV-19/USA/IN-PU-LH000157633/2021 | EPI_ISL_1823515 |
| hCoV-19/USA/IN-PU-LH000162518/2021 | EPI_ISL_1823514 |
| hCoV-19/USA/IN-PU-LH000154511/2021 | EPI_ISL_1823459 |
| hCoV-19/USA/IN-PU-LH000138689/2021 | EPI_ISL_1823430 |
| hCoV-19/USA/IN-PU-LH000112925/2021 | EPI_ISL_1823416 |
| hCoV-19/USA/IN-PU-LH000146963/2021 | EPI_ISL_1823409 |
| hCoV-19/USA/IN-PU-LH000146703/2021 | EPI_ISL_1823406 |
| hCoV-19/USA/IN-PU-LH000152549/2021 | EPI_ISL_1823513 |
| hCoV-19/USA/IN-PU-LH000166549/2021 | EPI_ISL_1823512 |
| hCoV-19/USA/IN-PU-LH000161813/2021 | EPI_ISL_1823458 |
| hCoV-19/USA/IN-PU-LH000151004/2021 | EPI_ISL_1823457 |
| hCoV-19/USA/IN-PU-LH000190836/2021 | EPI_ISL_1823510 |
| hCoV-19/USA/IN-PU-LH000128259/2021 | EPI_ISL_1823428 |
| hCoV-19/USA/IN-PU-LH000189386/2021 | EPI_ISL_1823508 |
| hCoV-19/USA/IN-PU-LH000165201/2021 | EPI_ISL_1823456 |
| hCoV-19/USA/IN-PU-LH000190775/2021 | EPI_ISL_1823507 |
| hCoV-19/USA/IN-PU-LH000190787/2021 | EPI_ISL_1823506 |

|                                    |                 |
|------------------------------------|-----------------|
| hCoV-19/USA/IN-PU-LH000165455/2021 | EPI_ISL_1823454 |
| hCoV-19/USA/IN-PU-LH000190899/2021 | EPI_ISL_1823505 |
| hCoV-19/USA/IN-PU-LH000101797/2021 | EPI_ISL_1823427 |
| hCoV-19/USA/IN-PU-LH000190893/2021 | EPI_ISL_1823504 |
| hCoV-19/USA/IN-PU-LH000165119/2021 | EPI_ISL_1823453 |
| hCoV-19/USA/IN-PU-LH000166879/2021 | EPI_ISL_1823503 |
| hCoV-19/USA/IN-PU-LH000152878/2021 | EPI_ISL_1823502 |
| hCoV-19/USA/IN-PU-LH000136098/2021 | EPI_ISL_1823452 |
| hCoV-19/USA/IN-PU-LH000089203/2021 | EPI_ISL_1823501 |
| hCoV-19/USA/IN-PU-LH000147463/2021 | EPI_ISL_1823426 |
| hCoV-19/USA/IN-PU-LH000161638/2021 | EPI_ISL_1823467 |
| hCoV-19/USA/IN-PU-LH000172706/2021 | EPI_ISL_1823500 |
| hCoV-19/USA/IN-PU-LH000190876/2021 | EPI_ISL_1823539 |
| hCoV-19/USA/IN-PU-LH000161862/2021 | EPI_ISL_1823481 |
| hCoV-19/USA/IN-PU-LH000126879/2021 | EPI_ISL_1823451 |
| hCoV-19/USA/IN-PU-LH000166894/2021 | EPI_ISL_1823499 |
| hCoV-19/USA/IN-PU-LH000166665/2021 | EPI_ISL_1823466 |
| hCoV-19/USA/IN-PU-LH000152631/2021 | EPI_ISL_1823529 |
| hCoV-19/USA/IN-PU-LH000105534/2021 | EPI_ISL_1823414 |
| hCoV-19/USA/IN-PU-LH000166650/2021 | EPI_ISL_1823498 |
| hCoV-19/USA/IN-PU-LH000111892/2021 | EPI_ISL_1823415 |
| hCoV-19/USA/IN-PU-LH000111761/2021 | EPI_ISL_1823408 |
| hCoV-19/USA/IN-PU-LH000165133/2021 | EPI_ISL_1823450 |
| hCoV-19/USA/IN-PU-LH000166713/2021 | EPI_ISL_1823497 |
| hCoV-19/USA/IN-PU-LH000111959/2021 | EPI_ISL_1823425 |
| hCoV-19/USA/IN-PU-LH000140648/2021 | EPI_ISL_1823438 |
| hCoV-19/USA/IN-PU-LH000043798/2021 | EPI_ISL_1823532 |

|                                    |                 |
|------------------------------------|-----------------|
| hCoV-19/USA/IN-PU-LH000111624/2021 | EPI_ISL_1823405 |
| hCoV-19/USA/IN-PU-LH000165387/2021 | EPI_ISL_1823496 |
| hCoV-19/USA/IN-PU-LH000101558/2021 | EPI_ISL_1823404 |
| hCoV-19/USA/IN-PU-LH000111914/2021 | EPI_ISL_1823449 |
| hCoV-19/USA/IN-PU-LH000166636/2021 | EPI_ISL_1823495 |
| hCoV-19/USA/IN-PU-LH000146858/2021 | EPI_ISL_1823407 |
| hCoV-19/USA/IN-PU-LH000101777/2021 | EPI_ISL_1823418 |
| hCoV-19/USA/IN-PU-LH000111777/2021 | EPI_ISL_1823448 |
| hCoV-19/USA/IN-PU-LH000166632/2021 | EPI_ISL_1823493 |
| hCoV-19/USA/IN-PU-LH000112925/2021 | EPI_ISL_1823416 |
| hCoV-19/USA/IN-PU-LH000081212/2021 | EPI_ISL_1823424 |
| hCoV-19/USA/IN-PU-LH000176724/2021 | EPI_ISL_1823509 |
| hCoV-19/USA/IN-PU-LH000166616/2021 | EPI_ISL_1823494 |
| hCoV-19/USA/IN-PU-LH000166615/2021 | EPI_ISL_1823492 |
| hCoV-19/USA/IN-PU-LH000111579/2021 | EPI_ISL_1823413 |
| hCoV-19/USA/IN-PU-LH000128233/2021 | EPI_ISL_1823431 |
| hCoV-19/USA/IN-PU-LH000166579/2021 | EPI_ISL_1823489 |
| hCoV-19/USA/IN-PU-LH000146891/2021 | EPI_ISL_1823566 |
| hCoV-19/USA/IN-PU-LH000174057/2021 | EPI_ISL_1823565 |
| hCoV-19/USA/IN-PU-LH000166544/2021 | EPI_ISL_1823487 |
| hCoV-19/USA/IN-PU-LH000167635/2021 | EPI_ISL_1823446 |
| hCoV-19/USA/IN-PU-LH000101873/2021 | EPI_ISL_1823423 |
| hCoV-19/USA/IN-PU-LH000190876/2021 | EPI_ISL_1823539 |
| hCoV-19/USA/IN-PU-LH000146837/2021 | EPI_ISL_1823564 |
| hCoV-19/USA/IN-PU-LH000190831/2021 | EPI_ISL_1823563 |
| hCoV-19/USA/IN-PU-LH000105605/2021 | EPI_ISL_1823417 |
| hCoV-19/USA/IN-PU-LH000161932/2021 | EPI_ISL_1823486 |

|                                    |                 |
|------------------------------------|-----------------|
| hCoV-19/USA/IN-PU-LH000173055/2021 | EPI_ISL_1823562 |
| hCoV-19/USA/IN-PU-LH000151660/2021 | EPI_ISL_1823561 |
| hCoV-19/USA/IN-PU-LH000161534/2021 | EPI_ISL_1823485 |
| hCoV-19/USA/IN-PU-LH000158494/2021 | EPI_ISL_1823445 |
| hCoV-19/USA/IN-PU-LH000097312/2021 | EPI_ISL_1823560 |
| hCoV-19/USA/IN-PU-LH000190754/2021 | EPI_ISL_1823559 |
| hCoV-19/USA/IN-PU-LH000155452/2021 | EPI_ISL_1823484 |
| hCoV-19/USA/IN-PU-LH000175511/2021 | EPI_ISL_1823558 |
| hCoV-19/USA/IN-PU-LH000190882/2021 | EPI_ISL_1823557 |
| hCoV-19/USA/IN-PU-LH000165687/2021 | EPI_ISL_1823483 |
| hCoV-19/USA/IN-PU-LH000165484/2021 | EPI_ISL_1823444 |
| hCoV-19/USA/IN-PU-LH000084696/2021 | EPI_ISL_1823422 |
| hCoV-19/USA/IN-PU-LH000189404/2021 | EPI_ISL_1823556 |
| hCoV-19/USA/IN-PU-LH000174093/2021 | EPI_ISL_1823555 |
| hCoV-19/USA/IN-PU-LH000101989/2021 | EPI_ISL_1823419 |
| hCoV-19/USA/IN-PU-LH000161809/2021 | EPI_ISL_1823482 |
| hCoV-19/USA/IN-PU-LH000097548/2021 | EPI_ISL_1823554 |
| hCoV-19/USA/IN-PU-LH000043629/2021 | EPI_ISL_1823553 |
| hCoV-19/USA/IN-PU-LH000161782/2021 | EPI_ISL_1823480 |
| hCoV-19/USA/IN-PU-LH000128156/2021 | EPI_ISL_1823443 |
| hCoV-19/USA/IN-PU-LH000174037/2021 | EPI_ISL_1823552 |
| hCoV-19/USA/IN-PU-LH000166934/2021 | EPI_ISL_1823551 |
| hCoV-19/USA/IN-PU-LH000111964/2021 | EPI_ISL_1823479 |
| hCoV-19/USA/IN-PU-LH000164236/2021 | EPI_ISL_1823550 |
| hCoV-19/USA/IN-PU-LH000189330/2021 | EPI_ISL_1823549 |
| hCoV-19/USA/IN-PU-LH000161725/2021 | EPI_ISL_1823478 |
| hCoV-19/USA/IN-PU-LH000128227/2021 | EPI_ISL_1823442 |

|                                    |                 |
|------------------------------------|-----------------|
| hCoV-19/USA/IN-PU-LH000101997/2021 | EPI_ISL_1823421 |
| hCoV-19/USA/IN-PU-LH000105428/2021 | EPI_ISL_1823411 |
| hCoV-19/USA/IN-PU-LH000174011/2021 | EPI_ISL_1823542 |
| hCoV-19/USA/IN-PU-LH000101777/2021 | EPI_ISL_1823418 |
| hCoV-19/USA/IN-PU-LH000128233/2021 | EPI_ISL_1823431 |
| hCoV-19/USA/IN-PU-LH000128375/2021 | EPI_ISL_1823432 |
| hCoV-19/USA/IN-PU-LH000165084/2021 | EPI_ISL_1823436 |
| hCoV-19/USA/IN-PU-LH000140648/2021 | EPI_ISL_1823438 |
| hCoV-19/USA/IN-PU-LH000166665/2021 | EPI_ISL_1823466 |
| hCoV-19/USA/IN-PU-LH000161638/2021 | EPI_ISL_1823467 |
| hCoV-19/USA/IN-PU-LH000189685/2021 | EPI_ISL_2304460 |
| hCoV-19/USA/IN-PU-LH000177872/2021 | EPI_ISL_2304458 |
| hCoV-19/USA/IN-PU-LH000115645/2021 | EPI_ISL_2304457 |
| hCoV-19/USA/IN-PU-LH000179466/2021 | EPI_ISL_2304453 |
| hCoV-19/USA/IN-PU-LH000189756/2021 | EPI_ISL_2304451 |
| hCoV-19/USA/IN-PU-LH000183890/2021 | EPI_ISL_2304449 |
| hCoV-19/USA/IN-PU-LH000189737/2021 | EPI_ISL_2304446 |
| hCoV-19/USA/IN-PU-LH000187551/2021 | EPI_ISL_2304444 |
| hCoV-19/USA/IN-PU-LH000171133/2021 | EPI_ISL_2304442 |
| hCoV-19/USA/IN-PU-LH000159133/2021 | EPI_ISL_2304441 |
| hCoV-19/USA/IN-PU-LH000184440/2021 | EPI_ISL_2304439 |
| hCoV-19/USA/IN-PU-LH000183994/2021 | EPI_ISL_2304438 |
| hCoV-19/USA/IN-PU-LH000183853/2021 | EPI_ISL_2304437 |
| hCoV-19/USA/IN-PU-LH000190170/2021 | EPI_ISL_2304436 |
| hCoV-19/USA/IN-PU-LH000179679/2021 | EPI_ISL_2304433 |
| hCoV-19/USA/IN-PU-LH000180976/2021 | EPI_ISL_2304432 |
| hCoV-19/USA/IN-PU-LH000185841/2021 | EPI_ISL_2304431 |

|                                    |                 |
|------------------------------------|-----------------|
| hCoV-19/USA/IN-PU-LH000172626/2021 | EPI_ISL_2304430 |
| hCoV-19/USA/IN-PU-LH000181970/2021 | EPI_ISL_2304428 |
| hCoV-19/USA/IN-PU-LH000176624/2021 | EPI_ISL_2304427 |
| hCoV-19/USA/IN-PU-LH000187880/2021 | EPI_ISL_2304426 |
| hCoV-19/USA/IN-PU-LH000171098/2021 | EPI_ISL_2304425 |
| hCoV-19/USA/IN-PU-LH000171138/2021 | EPI_ISL_2304424 |
| hCoV-19/USA/IN-PU-LH000184489/2021 | EPI_ISL_2304423 |
| hCoV-19/USA/IN-PU-LH000183886/2021 | EPI_ISL_2304422 |
| hCoV-19/USA/IN-PU-LH000180698/2021 | EPI_ISL_2304421 |
| hCoV-19/USA/IN-PU-LH000183590/2021 | EPI_ISL_2304420 |
| hCoV-19/USA/IN-PU-LH000188675/2021 | EPI_ISL_2304417 |
| hCoV-19/USA/IN-PU-LH000175112/2021 | EPI_ISL_2304416 |
| hCoV-19/USA/IN-PU-LH000177043/2021 | EPI_ISL_2304415 |
| hCoV-19/USA/IN-PU-LH000179622/2021 | EPI_ISL_2304414 |
| hCoV-19/USA/IN-PU-LH000104681/2021 | EPI_ISL_2304413 |
| hCoV-19/USA/IN-PU-LH000186929/2021 | EPI_ISL_2304412 |
| hCoV-19/USA/IN-PU-LH000171088/2021 | EPI_ISL_2304411 |
| hCoV-19/USA/IN-PU-LH000176477/2021 | EPI_ISL_2304409 |
| hCoV-19/USA/IN-PU-LH000176693/2021 | EPI_ISL_2304407 |
| hCoV-19/USA/IN-PU-LH000176380/2021 | EPI_ISL_2304406 |
| hCoV-19/USA/IN-PU-LH000190871/2021 | EPI_ISL_2304405 |
| hCoV-19/USA/IN-PU-LH000115808/2021 | EPI_ISL_2304404 |
| hCoV-19/USA/IN-PU-LH000171082/2021 | EPI_ISL_2304403 |
| hCoV-19/USA/IN-PU-LH000187287/2021 | EPI_ISL_2304402 |
| hCoV-19/USA/IN-PU-LH000188025/2021 | EPI_ISL_2304401 |
| hCoV-19/USA/IN-PU-LH000188136/2021 | EPI_ISL_2304400 |
| hCoV-19/USA/IN-PU-LH000171159/2021 | EPI_ISL_2304399 |



|                                    |                 |
|------------------------------------|-----------------|
| hCoV-19/USA/IN-PU-LH000173402/2021 | EPI_ISL_2304398 |
| hCoV-19/USA/IN-PU-LH000181484/2021 | EPI_ISL_2304396 |
| hCoV-19/USA/IN-PU-LH000174716/2021 | EPI_ISL_2304394 |
| hCoV-19/USA/IN-PU-LH000172533/2021 | EPI_ISL_2304393 |
| hCoV-19/USA/IN-PU-LH000181807/2021 | EPI_ISL_2304392 |
| hCoV-19/USA/IN-PU-LH000180366/2021 | EPI_ISL_2304391 |
| hCoV-19/USA/IN-PU-LH000182994/2021 | EPI_ISL_2304390 |
| hCoV-19/USA/IN-PU-LH000181359/2021 | EPI_ISL_2304389 |
| hCoV-19/USA/IN-PU-LH000175112/2021 | EPI_ISL_2304416 |
| hCoV-19/USA/IN-PU-LH000177043/2021 | EPI_ISL_2304415 |
| hCoV-19/USA/IN-PU-LH000179622/2021 | EPI_ISL_2304414 |
| hCoV-19/USA/IN-PU-LH000104681/2021 | EPI_ISL_2304413 |
| hCoV-19/USA/IN-PU-LH000186929/2021 | EPI_ISL_2304412 |
| hCoV-19/USA/IN-PU-LH000171088/2021 | EPI_ISL_2304411 |
| hCoV-19/USA/IN-PU-LH000176477/2021 | EPI_ISL_2304409 |
| hCoV-19/USA/IN-PU-LH000176693/2021 | EPI_ISL_2304407 |
| hCoV-19/USA/IN-PU-LH000176380/2021 | EPI_ISL_2304406 |
| hCoV-19/USA/IN-PU-LH000190871/2021 | EPI_ISL_2304405 |
| hCoV-19/USA/IN-PU-LH000115808/2021 | EPI_ISL_2304404 |
| hCoV-19/USA/IN-PU-LH000171082/2021 | EPI_ISL_2304403 |
| hCoV-19/USA/IN-PU-LH000187287/2021 | EPI_ISL_2304402 |
| hCoV-19/USA/IN-PU-LH000188025/2021 | EPI_ISL_2304401 |
| hCoV-19/USA/IN-PU-LH000188136/2021 | EPI_ISL_2304400 |
| hCoV-19/USA/IN-PU-LH000171159/2021 | EPI_ISL_2304399 |
| hCoV-19/USA/IN-PU-LH000173402/2021 | EPI_ISL_2304398 |
| hCoV-19/USA/IN-PU-LH000181484/2021 | EPI_ISL_2304396 |
| hCoV-19/USA/IN-PU-LH000174716/2021 | EPI_ISL_2304394 |

|                                    |                 |
|------------------------------------|-----------------|
| hCoV-19/USA/IN-PU-LH000172533/2021 | EPI_ISL_2304393 |
| hCoV-19/USA/IN-PU-LH000181807/2021 | EPI_ISL_2304392 |
| hCoV-19/USA/IN-PU-LH000180366/2021 | EPI_ISL_2304391 |
| hCoV-19/USA/IN-PU-LH000182994/2021 | EPI_ISL_2304390 |
| hCoV-19/USA/IN-PU-LH000181359/2021 | EPI_ISL_2304389 |
| hCoV-19/USA/IN-PU-LH000177963/2021 | EPI_ISL_2304388 |
| hCoV-19/USA/IN-PU-LH000181983/2021 | EPI_ISL_2304387 |
| hCoV-19/USA/IN-PU-LH000185305/2021 | EPI_ISL_2304386 |
| hCoV-19/USA/IN-PU-LH000185162/2021 | EPI_ISL_2304385 |
| hCoV-19/USA/IN-PU-LH000176641/2021 | EPI_ISL_2304384 |
| hCoV-19/USA/IN-PU-LH000171767/2021 | EPI_ISL_2304383 |
| hCoV-19/USA/IN-PU-LH000187686/2021 | EPI_ISL_2304382 |
| hCoV-19/USA/IN-PU-LH000176634/2021 | EPI_ISL_2304381 |
| hCoV-19/USA/IN-PU-LH000176658/2021 | EPI_ISL_2304380 |
| hCoV-19/USA/IN-PU-LH000174005/2021 | EPI_ISL_2304379 |
| hCoV-19/USA/IN-PU-LH000181377/2021 | EPI_ISL_2304378 |
| hCoV-19/USA/IN-PU-LH000176711/2021 | EPI_ISL_2304377 |
| hCoV-19/USA/IN-PU-LH000173139/2021 | EPI_ISL_2304373 |
| hCoV-19/USA/IN-PU-LH000175466/2021 | EPI_ISL_2304372 |
| hCoV-19/USA/IN-PU-LH000172545/2021 | EPI_ISL_2304371 |
| hCoV-19/USA/IN-PU-LH000143627/2021 | EPI_ISL_2304370 |
| hCoV-19/USA/IN-PU-LH000191319/2021 | EPI_ISL_2304369 |
| hCoV-19/USA/IN-PU-LH000171970/2021 | EPI_ISL_2304368 |
| hCoV-19/USA/IN-PU-LH000179679/2021 | EPI_ISL_2304433 |
| hCoV-19/USA/IN-PU-LH000190170/2021 | EPI_ISL_2304436 |
| hCoV-19/USA/IN-PU-LH000183853/2021 | EPI_ISL_2304437 |
| hCoV-19/USA/IN-PU-LH000183994/2021 | EPI_ISL_2304438 |

|                                    |                 |
|------------------------------------|-----------------|
| hCoV-19/USA/IN-PU-LH000184440/2021 | EPI_ISL_2304439 |
| hCoV-19/USA/IN-PU-LH000159133/2021 | EPI_ISL_2304441 |
| hCoV-19/USA/IN-PU-LH000171133/2021 | EPI_ISL_2304442 |
| hCoV-19/USA/IN-PU-LH000187551/2021 | EPI_ISL_2304444 |
| hCoV-19/USA/IN-PU-LH000189737/2021 | EPI_ISL_2304446 |
| hCoV-19/USA/IN-PU-LH000183890/2021 | EPI_ISL_2304449 |
| hCoV-19/USA/IN-PU-LH000189756/2021 | EPI_ISL_2304451 |
| hCoV-19/USA/IN-PU-LH000179466/2021 | EPI_ISL_2304453 |
| hCoV-19/USA/IN-PU-LH000115645/2021 | EPI_ISL_2304457 |
| hCoV-19/USA/IN-PU-LH000177872/2021 | EPI_ISL_2304458 |
| hCoV-19/USA/IN-PU-LH000189685/2021 | EPI_ISL_2304460 |
| hCoV-19/USA/IN-PU-LH000187547/2021 | EPI_ISL_2304443 |
| hCoV-19/USA/IN-PU-LH000189891/2021 | EPI_ISL_2304440 |
| hCoV-19/USA/IN-PU-LH000115704/2021 | EPI_ISL_2304445 |
| hCoV-19/USA/IN-PU-LH000189787/2021 | EPI_ISL_2304447 |
| hCoV-19/USA/IN-PU-LH000183907/2021 | EPI_ISL_2304448 |
| hCoV-19/USA/IN-PU-LH000185993/2021 | EPI_ISL_2304450 |
| hCoV-19/USA/IN-PU-Ih000082308/2021 | EPI_ISL_5990416 |
| hCoV-19/USA/IN-PU-Ih000111788/2021 | EPI_ISL_5990219 |
| hCoV-19/USA/IN-PU-Ih000115424/2021 | EPI_ISL_5990430 |
| hCoV-19/USA/IN-PU-Ih000043557/2021 | EPI_ISL_5990206 |
| hCoV-19/USA/IN-PU-Ih000094033/2021 | EPI_ISL_5990207 |
| hCoV-19/USA/IN-PU-Ih000094088/2021 | EPI_ISL_5990208 |
| hCoV-19/USA/IN-PU-Ih000132517/2021 | EPI_ISL_5990209 |
| hCoV-19/USA/IN-PU-Ih000132574/2021 | EPI_ISL_5990210 |
| hCoV-19/USA/IN-PU-Ih000100073/2021 | EPI_ISL_5990211 |
| hCoV-19/USA/IN-PU-Ih000132796/2021 | EPI_ISL_5990212 |

|                                    |                 |
|------------------------------------|-----------------|
| hCoV-19/USA/IN-PU-Ih000121532/2021 | EPI_ISL_5990213 |
| hCoV-19/USA/IN-PU-Ih000132742/2021 | EPI_ISL_5990214 |
| hCoV-19/USA/IN-PU-Ih000094335/2021 | EPI_ISL_5990215 |
| hCoV-19/USA/IN-PU-Ih000121800/2021 | EPI_ISL_5990216 |
| hCoV-19/USA/IN-PU-Ih000121857/2021 | EPI_ISL_5990217 |
| hCoV-19/USA/IN-PU-Ih000121864/2021 | EPI_ISL_5990218 |
| hCoV-19/USA/IN-PU-Ih000111702/2021 | EPI_ISL_5990220 |
| hCoV-19/USA/IN-PU-Ih000119980/2021 | EPI_ISL_5990221 |
| hCoV-19/USA/IN-PU-Ih000106554/2021 | EPI_ISL_5990222 |
| hCoV-19/USA/IN-PU-Ih000100219/2021 | EPI_ISL_5990223 |
| hCoV-19/USA/IN-PU-Ih000121801/2021 | EPI_ISL_5990224 |
| hCoV-19/USA/IN-PU-Ih000111763/2021 | EPI_ISL_5990225 |
| hCoV-19/USA/IN-PU-Ih000121894/2021 | EPI_ISL_5990226 |
| hCoV-19/USA/IN-PU-Ih000111882/2021 | EPI_ISL_5990227 |
| hCoV-19/USA/IN-PU-Ih000121826/2021 | EPI_ISL_5990228 |
| hCoV-19/USA/IN-PU-Ih000121758/2021 | EPI_ISL_5990229 |
| hCoV-19/USA/IN-PU-Ih000125694/2021 | EPI_ISL_5990230 |
| hCoV-19/USA/IN-PU-Ih000121882/2021 | EPI_ISL_5990231 |
| hCoV-19/USA/IN-PU-Ih000122009/2021 | EPI_ISL_5990232 |
| hCoV-19/USA/IN-PU-Ih000122422/2021 | EPI_ISL_5990233 |
| hCoV-19/USA/IN-PU-Ih000130986/2021 | EPI_ISL_5990234 |
| hCoV-19/USA/IN-PU-Ih000121542/2021 | EPI_ISL_5990235 |
| hCoV-19/USA/IN-PU-Ih000121583/2021 | EPI_ISL_5990236 |
| hCoV-19/USA/IN-PU-Ih000130928/2021 | EPI_ISL_5990237 |
| hCoV-19/USA/IN-PU-Ih000130974/2021 | EPI_ISL_5990238 |
| hCoV-19/USA/IN-PU-Ih000137182/2021 | EPI_ISL_5990239 |
| hCoV-19/USA/IN-PU-Ih000137512/2021 | EPI_ISL_5990240 |

|                                    |                 |
|------------------------------------|-----------------|
| hCoV-19/USA/IN-PU-Ih000137170/2021 | EPI_ISL_5990241 |
| hCoV-19/USA/IN-PU-Ih000141676/2021 | EPI_ISL_5990242 |
| hCoV-19/USA/IN-PU-Ih000122223/2021 | EPI_ISL_5990243 |
| hCoV-19/USA/IN-PU-Ih000125333/2021 | EPI_ISL_5990244 |
| hCoV-19/USA/IN-PU-Ih000137166/2021 | EPI_ISL_5990245 |
| hCoV-19/USA/IN-PU-Ih000111566/2021 | EPI_ISL_5990246 |
| hCoV-19/USA/IN-PU-Ih000137325/2021 | EPI_ISL_5990247 |
| hCoV-19/USA/IN-PU-Ih000137155/2021 | EPI_ISL_5990248 |
| hCoV-19/USA/IN-PU-Ih000133519/2021 | EPI_ISL_5990249 |
| hCoV-19/USA/IN-PU-Ih000134450/2021 | EPI_ISL_5990250 |
| hCoV-19/USA/IN-PU-Ih000144527/2021 | EPI_ISL_5990251 |
| hCoV-19/USA/IN-PU-Ih000137271/2021 | EPI_ISL_5990252 |
| hCoV-19/USA/IN-PU-Ih000137445/2021 | EPI_ISL_5990253 |
| hCoV-19/USA/IN-PU-Ih000137439/2021 | EPI_ISL_5990254 |
| hCoV-19/USA/IN-PU-Ih000137209/2021 | EPI_ISL_5990255 |
| hCoV-19/USA/IN-PU-Ih000144566/2021 | EPI_ISL_5990256 |
| hCoV-19/USA/IN-PU-Ih000144547/2021 | EPI_ISL_5990257 |
| hCoV-19/USA/IN-PU-Ih000144862/2021 | EPI_ISL_5990258 |
| hCoV-19/USA/IN-PU-Ih000144786/2021 | EPI_ISL_5990259 |
| hCoV-19/USA/IN-PU-Ih000144665/2021 | EPI_ISL_5990260 |
| hCoV-19/USA/IN-PU-Ih000144663/2021 | EPI_ISL_5990261 |
| hCoV-19/USA/IN-PU-Ih000146503/2021 | EPI_ISL_5990262 |
| hCoV-19/USA/IN-PU-Ih000144748/2021 | EPI_ISL_5990263 |
| hCoV-19/USA/IN-PU-Ih000111522/2021 | EPI_ISL_5990264 |
| hCoV-19/USA/IN-PU-Ih000129209/2021 | EPI_ISL_5990265 |
| hCoV-19/USA/IN-PU-Ih000144912/2021 | EPI_ISL_5990266 |
| hCoV-19/USA/IN-PU-Ih000130924/2021 | EPI_ISL_5990267 |

|                                    |                 |
|------------------------------------|-----------------|
| hCoV-19/USA/IN-PU-Ih000111891/2021 | EPI_ISL_5990268 |
| hCoV-19/USA/IN-PU-Ih000130960/2021 | EPI_ISL_5990269 |
| hCoV-19/USA/IN-PU-Ih000146818/2021 | EPI_ISL_5990270 |
| hCoV-19/USA/IN-PU-Ih000146802/2021 | EPI_ISL_5990271 |
| hCoV-19/USA/IN-PU-Ih000105385/2021 | EPI_ISL_5990272 |
| hCoV-19/USA/IN-PU-Ih000105322/2021 | EPI_ISL_5990273 |
| hCoV-19/USA/IN-PU-Ih000146992/2021 | EPI_ISL_5990274 |
| hCoV-19/USA/IN-PU-Ih000105401/2021 | EPI_ISL_5990275 |
| hCoV-19/USA/IN-PU-Ih000105526/2021 | EPI_ISL_5990276 |
| hCoV-19/USA/IN-PU-Ih000146987/2021 | EPI_ISL_5990277 |
| hCoV-19/USA/IN-PU-Ih000105772/2021 | EPI_ISL_5990278 |
| hCoV-19/USA/IN-PU-Ih000105545/2021 | EPI_ISL_5990279 |
| hCoV-19/USA/IN-PU-Ih000105651/2021 | EPI_ISL_5990280 |
| hCoV-19/USA/IN-PU-Ih000105540/2021 | EPI_ISL_5990281 |
| hCoV-19/USA/IN-PU-Ih000105696/2021 | EPI_ISL_5990282 |
| hCoV-19/USA/IN-PU-Ih000105718/2021 | EPI_ISL_5990283 |
| hCoV-19/USA/IN-PU-Ih000157105/2021 | EPI_ISL_5990284 |
| hCoV-19/USA/IN-PU-Ih000146885/2021 | EPI_ISL_5990285 |
| hCoV-19/USA/IN-PU-Ih000116202/2021 | EPI_ISL_5990286 |
| hCoV-19/USA/IN-PU-Ih000116178/2021 | EPI_ISL_5990287 |
| hCoV-19/USA/IN-PU-Ih000116500/2021 | EPI_ISL_5990288 |
| hCoV-19/USA/IN-PU-Ih000116312/2021 | EPI_ISL_5990289 |
| hCoV-19/USA/IN-PU-Ih000116256/2021 | EPI_ISL_5990290 |
| hCoV-19/USA/IN-PU-Ih000116068/2021 | EPI_ISL_5990291 |
| hCoV-19/USA/IN-PU-Ih000116177/2021 | EPI_ISL_5990292 |
| hCoV-19/USA/IN-PU-Ih000116275/2021 | EPI_ISL_5990293 |
| hCoV-19/USA/IN-PU-Ih000101188/2021 | EPI_ISL_5990294 |

|                                    |                 |
|------------------------------------|-----------------|
| hCoV-19/USA/IN-PU-Ih000116292/2021 | EPI_ISL_5990295 |
| hCoV-19/USA/IN-PU-Ih000116185/2021 | EPI_ISL_5990296 |
| hCoV-19/USA/IN-PU-Ih000116429/2021 | EPI_ISL_5990297 |
| hCoV-19/USA/IN-PU-Ih000116108/2021 | EPI_ISL_5990298 |
| hCoV-19/USA/IN-PU-Ih000116439/2021 | EPI_ISL_5990299 |
| hCoV-19/USA/IN-PU-Ih000115264/2021 | EPI_ISL_5990300 |
| hCoV-19/USA/IN-PU-Ih000010575/2021 | EPI_ISL_5990301 |
| hCoV-19/USA/IN-PU-Ih000086980/2021 | EPI_ISL_5990302 |
| hCoV-19/USA/IN-PU-Ih000086853/2021 | EPI_ISL_5990303 |
| hCoV-19/USA/IN-PU-Ih000097818/2021 | EPI_ISL_5990304 |
| hCoV-19/USA/IN-PU-Ih000086917/2021 | EPI_ISL_5990305 |
| hCoV-19/USA/IN-PU-Ih000080511/2021 | EPI_ISL_5990306 |
| hCoV-19/USA/IN-PU-Ih000080773/2021 | EPI_ISL_5990307 |
| hCoV-19/USA/IN-PU-Ih000086858/2021 | EPI_ISL_5990308 |
| hCoV-19/USA/IN-PU-Ih000080528/2021 | EPI_ISL_5990309 |
| hCoV-19/USA/IN-PU-Ih000080594/2021 | EPI_ISL_5990310 |
| hCoV-19/USA/IN-PU-Ih000086914/2021 | EPI_ISL_5990311 |
| hCoV-19/USA/IN-PU-Ih000085105/2021 | EPI_ISL_5990312 |
| hCoV-19/USA/IN-PU-Ih000080595/2021 | EPI_ISL_5990313 |
| hCoV-19/USA/IN-PU-Ih000080772/2021 | EPI_ISL_5990314 |
| hCoV-19/USA/IN-PU-Ih000145262/2021 | EPI_ISL_5990315 |
| hCoV-19/USA/IN-PU-Ih000100586/2021 | EPI_ISL_5990316 |
| hCoV-19/USA/IN-PU-Ih000082273/2021 | EPI_ISL_5990317 |
| hCoV-19/USA/IN-PU-Ih000094106/2021 | EPI_ISL_5990318 |
| hCoV-19/USA/IN-PU-Ih000082146/2021 | EPI_ISL_5990319 |
| hCoV-19/USA/IN-PU-Ih000145143/2021 | EPI_ISL_5990320 |
| hCoV-19/USA/IN-PU-Ih000145278/2021 | EPI_ISL_5990321 |

|                                    |                 |
|------------------------------------|-----------------|
| hCoV-19/USA/IN-PU-Ih000082246/2021 | EPI_ISL_5990322 |
| hCoV-19/USA/IN-PU-Ih000094432/2021 | EPI_ISL_5990323 |
| hCoV-19/USA/IN-PU-Ih000115244/2021 | EPI_ISL_5990324 |
| hCoV-19/USA/IN-PU-Ih000094457/2021 | EPI_ISL_5990325 |
| hCoV-19/USA/IN-PU-Ih000109445/2021 | EPI_ISL_5990326 |
| hCoV-19/USA/IN-PU-Ih000109398/2021 | EPI_ISL_5990328 |
| hCoV-19/USA/IN-PU-Ih000110887/2021 | EPI_ISL_5990329 |
| hCoV-19/USA/IN-PU-Ih000100983/2021 | EPI_ISL_5990330 |
| hCoV-19/USA/IN-PU-Ih000101161/2021 | EPI_ISL_5990331 |
| hCoV-19/USA/IN-PU-Ih000116122/2021 | EPI_ISL_5990332 |
| hCoV-19/USA/IN-PU-Ih000101347/2021 | EPI_ISL_5990333 |
| hCoV-19/USA/IN-PU-Ih000101466/2021 | EPI_ISL_5990334 |
| hCoV-19/USA/IN-PU-Ih000101068/2021 | EPI_ISL_5990335 |
| hCoV-19/USA/IN-PU-Ih000094063/2021 | EPI_ISL_5990336 |
| hCoV-19/USA/IN-PU-Ih000086865/2021 | EPI_ISL_5990337 |
| hCoV-19/USA/IN-PU-Ih000094286/2021 | EPI_ISL_5990338 |
| hCoV-19/USA/IN-PU-Ih000085958/2021 | EPI_ISL_5990339 |
| hCoV-19/USA/IN-PU-Ih000094396/2021 | EPI_ISL_5990340 |
| hCoV-19/USA/IN-PU-Ih000082633/2021 | EPI_ISL_5990341 |
| hCoV-19/USA/IN-PU-Ih000082610/2021 | EPI_ISL_5990342 |
| hCoV-19/USA/IN-PU-Ih000086764/2021 | EPI_ISL_5990343 |
| hCoV-19/USA/IN-PU-Ih000080656/2021 | EPI_ISL_5990344 |
| hCoV-19/USA/IN-PU-Ih000086872/2021 | EPI_ISL_5990345 |
| hCoV-19/USA/IN-PU-Ih000086755/2021 | EPI_ISL_5990346 |
| hCoV-19/USA/IN-PU-Ih000080581/2021 | EPI_ISL_5990347 |
| hCoV-19/USA/IN-PU-Ih000080584/2021 | EPI_ISL_5990348 |
| hCoV-19/USA/IN-PU-Ih000080776/2021 | EPI_ISL_5990349 |



|                                    |                 |
|------------------------------------|-----------------|
| hCoV-19/USA/IN-PU-Ih000080718/2021 | EPI_ISL_5990350 |
| hCoV-19/USA/IN-PU-Ih000080714/2021 | EPI_ISL_5990351 |
| hCoV-19/USA/IN-PU-Ih000104035/2021 | EPI_ISL_5990352 |
| hCoV-19/USA/IN-PU-Ih000080706/2021 | EPI_ISL_5990353 |
| hCoV-19/USA/IN-PU-Ih000080848/2021 | EPI_ISL_5990354 |
| hCoV-19/USA/IN-PU-Ih000080572/2021 | EPI_ISL_5990355 |
| hCoV-19/USA/IN-PU-Ih000086920/2021 | EPI_ISL_5990356 |
| hCoV-19/USA/IN-PU-Ih000124668/2021 | EPI_ISL_5990357 |
| hCoV-19/USA/IN-PU-Ih000109122/2021 | EPI_ISL_5990358 |
| hCoV-19/USA/IN-PU-Ih000109009/2021 | EPI_ISL_5990359 |
| hCoV-19/USA/IN-PU-Ih000130880/2021 | EPI_ISL_5990360 |
| hCoV-19/USA/IN-PU-Ih000111561/2021 | EPI_ISL_5990361 |
| hCoV-19/USA/IN-PU-Ih000105463/2021 | EPI_ISL_5990362 |
| hCoV-19/USA/IN-PU-Ih000130658/2021 | EPI_ISL_5990363 |
| hCoV-19/USA/IN-PU-Ih000137287/2021 | EPI_ISL_5990364 |
| hCoV-19/USA/IN-PU-Ih000137119/2021 | EPI_ISL_5990365 |
| hCoV-19/USA/IN-PU-Ih000084676/2021 | EPI_ISL_5990366 |
| hCoV-19/USA/IN-PU-Ih000063970/2021 | EPI_ISL_5990367 |
| hCoV-19/USA/IN-PU-Ih000132476/2021 | EPI_ISL_5990368 |
| hCoV-19/USA/IN-PU-Ih000109024/2021 | EPI_ISL_5990369 |
| hCoV-19/USA/IN-PU-Ih000101708/2021 | EPI_ISL_5990370 |
| hCoV-19/USA/IN-PU-Ih000156554/2021 | EPI_ISL_5990371 |
| hCoV-19/USA/IN-PU-Ih000104097/2021 | EPI_ISL_5990372 |
| hCoV-19/USA/IN-PU-Ih000080520/2021 | EPI_ISL_5990373 |
| hCoV-19/USA/IN-PU-Ih000080651/2021 | EPI_ISL_5990374 |
| hCoV-19/USA/IN-PU-Ih000098876/2021 | EPI_ISL_5990375 |
| hCoV-19/USA/IN-PU-Ih000080906/2021 | EPI_ISL_5990376 |

|                                    |                 |
|------------------------------------|-----------------|
| hCoV-19/USA/IN-PU-Ih000094048/2021 | EPI_ISL_5990377 |
| hCoV-19/USA/IN-PU-Ih000094260/2021 | EPI_ISL_5990378 |
| hCoV-19/USA/IN-PU-Ih000094337/2021 | EPI_ISL_5990379 |
| hCoV-19/USA/IN-PU-Ih000094066/2021 | EPI_ISL_5990380 |
| hCoV-19/USA/IN-PU-Ih000132596/2021 | EPI_ISL_5990381 |
| hCoV-19/USA/IN-PU-Ih000121584/2021 | EPI_ISL_5990382 |
| hCoV-19/USA/IN-PU-Ih000121717/2021 | EPI_ISL_5990383 |
| hCoV-19/USA/IN-PU-Ih000121568/2021 | EPI_ISL_5990384 |
| hCoV-19/USA/IN-PU-Ih000121510/2021 | EPI_ISL_5990385 |
| hCoV-19/USA/IN-PU-Ih000132664/2021 | EPI_ISL_5990386 |
| hCoV-19/USA/IN-PU-Ih000132651/2021 | EPI_ISL_5990387 |
| hCoV-19/USA/IN-PU-Ih000132996/2021 | EPI_ISL_5990388 |
| hCoV-19/USA/IN-PU-Ih000132673/2021 | EPI_ISL_5990389 |
| hCoV-19/USA/IN-PU-Ih000132975/2021 | EPI_ISL_5990390 |
| hCoV-19/USA/IN-PU-Ih000094278/2021 | EPI_ISL_5990391 |
| hCoV-19/USA/IN-PU-Ih000100042/2021 | EPI_ISL_5990392 |
| hCoV-19/USA/IN-PU-Ih000094168/2021 | EPI_ISL_5990393 |
| hCoV-19/USA/IN-PU-Ih000110618/2021 | EPI_ISL_5990394 |
| hCoV-19/USA/IN-PU-Ih000082626/2021 | EPI_ISL_5990395 |
| hCoV-19/USA/IN-PU-Ih000110798/2021 | EPI_ISL_5990396 |
| hCoV-19/USA/IN-PU-Ih000082744/2021 | EPI_ISL_5990397 |
| hCoV-19/USA/IN-PU-Ih000092563/2021 | EPI_ISL_5990398 |
| hCoV-19/USA/IN-PU-Ih000080963/2021 | EPI_ISL_5990399 |
| hCoV-19/USA/IN-PU-Ih000110644/2021 | EPI_ISL_5990401 |
| hCoV-19/USA/IN-PU-Ih000124822/2021 | EPI_ISL_5990402 |
| hCoV-19/USA/IN-PU-Ih000109243/2021 | EPI_ISL_5990403 |
| hCoV-19/USA/IN-PU-Ih000082247/2021 | EPI_ISL_5990404 |

|                                    |                 |
|------------------------------------|-----------------|
| hCoV-19/USA/IN-PU-Ih000115021/2021 | EPI_ISL_5990405 |
| hCoV-19/USA/IN-PU-Ih000145111/2021 | EPI_ISL_5990406 |
| hCoV-19/USA/IN-PU-Ih000124985/2021 | EPI_ISL_5990407 |
| hCoV-19/USA/IN-PU-Ih000110724/2021 | EPI_ISL_5990408 |
| hCoV-19/USA/IN-PU-Ih000086762/2021 | EPI_ISL_5990409 |
| hCoV-19/USA/IN-PU-Ih000080575/2021 | EPI_ISL_5990410 |
| hCoV-19/USA/IN-PU-Ih000124798/2021 | EPI_ISL_5990411 |
| hCoV-19/USA/IN-PU-Ih000124545/2021 | EPI_ISL_5990412 |
| hCoV-19/USA/IN-PU-Ih000092223/2021 | EPI_ISL_5990413 |
| hCoV-19/USA/IN-PU-Ih000116172/2021 | EPI_ISL_5990414 |
| hCoV-19/USA/IN-PU-Ih000094127/2021 | EPI_ISL_5990415 |
| hCoV-19/USA/IN-PU-Ih000082059/2021 | EPI_ISL_5990417 |
| hCoV-19/USA/IN-PU-Ih000116157/2021 | EPI_ISL_5990418 |
| hCoV-19/USA/IN-PU-Ih000145061/2021 | EPI_ISL_5990419 |
| hCoV-19/USA/IN-PU-Ih000145070/2021 | EPI_ISL_5990420 |
| hCoV-19/USA/IN-PU-Ih000145187/2021 | EPI_ISL_5990422 |
| hCoV-19/USA/IN-PU-Ih000145177/2021 | EPI_ISL_5990424 |
| hCoV-19/USA/IN-PU-Ih000145329/2021 | EPI_ISL_5990425 |
| hCoV-19/USA/IN-PU-Ih000082161/2021 | EPI_ISL_5990426 |
| hCoV-19/USA/IN-PU-Ih000082130/2021 | EPI_ISL_5990427 |
| hCoV-19/USA/IN-PU-Ih000082070/2021 | EPI_ISL_5990428 |
| hCoV-19/USA/IN-PU-Ih000080524/2021 | EPI_ISL_5990429 |
| hCoV-19/USA/IN-PU-Ih000128781/2021 | EPI_ISL_5990431 |
| hCoV-19/USA/IN-PU-Ih000100888/2021 | EPI_ISL_5990432 |
| hCoV-19/USA/IN-PU-Ih000145805/2021 | EPI_ISL_5990433 |
| hCoV-19/USA/IN-PU-Ih000082125/2021 | EPI_ISL_9272272 |
| hCoV-19/USA/IN-PU-Ih000139869/2021 | EPI_ISL_9272260 |

|                                    |                 |
|------------------------------------|-----------------|
| hCoV-19/USA/IN-PU-Ih000105755/2021 | EPI_ISL_9272263 |
| hCoV-19/USA/IN-PU-Ih000132705/2021 | EPI_ISL_9272259 |
| hCoV-19/USA/IN-PU-Ih000133586/2021 | EPI_ISL_9272261 |
| hCoV-19/USA/IN-PU-Ih000109361/2021 | EPI_ISL_9272275 |
| hCoV-19/USA/IN-PU-Ih000116556/2021 | EPI_ISL_9272258 |
| hCoV-19/USA/IN-PU-Ih000082300/2021 | EPI_ISL_9272276 |
| hCoV-19/USA/IN-PU-Ih000086889/2021 | EPI_ISL_9272274 |
| hCoV-19/USA/IN-PU-Ih000094379/2021 | EPI_ISL_9272270 |
| hCoV-19/USA/IN-PU-Ih000086772/2021 | EPI_ISL_9272267 |
| hCoV-19/USA/IN-PU-LH000175526/2021 | EPI_ISL_9272330 |
| hCoV-19/USA/IN-PU-LH000091753/2021 | EPI_ISL_9272325 |
| hCoV-19/USA/IN-PU-LH000153280/2021 | EPI_ISL_9272324 |
| hCoV-19/USA/IN-PU-LH000157851/2021 | EPI_ISL_9272323 |
| hCoV-19/USA/IN-PU-LH000174039/2021 | EPI_ISL_9272329 |
| hCoV-19/USA/IN-PU-LH000111857/2021 | EPI_ISL_9272308 |
| hCoV-19/USA/IN-PU-LH000185968/2021 | EPI_ISL_9272301 |
| hCoV-19/USA/IN-PU-LH000183970/2021 | EPI_ISL_9272300 |
| hCoV-19/USA/IN-PU-LH000115719/2021 | EPI_ISL_9272289 |
| hCoV-19/USA/IN-PU-LH000172505/2021 | EPI_ISL_9272288 |
| hCoV-19/USA/IN-PU-LH000172528/2021 | EPI_ISL_9272296 |
| hCoV-19/USA/IN-PU-LH000043501/2021 | EPI_ISL_9272279 |
| hCoV-19/USA/IN-PU-LH000191709/2021 | EPI_ISL_9272292 |
| hCoV-19/USA/IN-PU-LH000176701/2021 | EPI_ISL_9272290 |
| hCoV-19/USA/IN-PU-LH000177062/2021 | EPI_ISL_9272278 |
| hCoV-19/USA/IN-PU-LH000177980/2021 | EPI_ISL_9272280 |
| hCoV-19/USA/IN-PU-LH000171893/2021 | EPI_ISL_9272298 |
| hCoV-19/USA/IN-PU-LH000184528/2021 | EPI_ISL_9272282 |

|                                    |                 |
|------------------------------------|-----------------|
| hCoV-19/USA/IN-PU-LH000084431/2021 | EPI_ISL_9272283 |
| hCoV-19/USA/IN-PU-LH000175315/2021 | EPI_ISL_9272286 |
| hCoV-19/USA/IN-PU-LH000171072/2021 | EPI_ISL_9272287 |
| hCoV-19/USA/IN-PU-Ih000133297/2021 | EPI_ISL_9272262 |
| hCoV-19/USA/IN-PU-LH000144729/2021 | EPI_ISL_9272335 |
| hCoV-19/USA/IN-PU-LH000189903/2021 | EPI_ISL_9272333 |
| hCoV-19/USA/IN-PU-LH000189345/2021 | EPI_ISL_9272332 |
| hCoV-19/USA/IN-PU-LH000111954/2021 | EPI_ISL_9272334 |
| hCoV-19/USA/IN-PU-LH000115829/2021 | EPI_ISL_9272281 |
| hCoV-19/USA/IN-PU-LH000110949/2021 | EPI_ISL_9272340 |
| hCoV-19/USA/IN-PU-LH000144906/2021 | EPI_ISL_9272337 |
| hCoV-19/USA/IN-PU-LH000166661/2021 | EPI_ISL_9272327 |
| hCoV-19/USA/IN-PU-LH000188890/2021 | EPI_ISL_9272328 |
| hCoV-19/USA/IN-PU-LH000155753/2021 | EPI_ISL_9272326 |
| hCoV-19/USA/IN-PU-LH000174492/2021 | EPI_ISL_9272331 |
| hCoV-19/USA/IN-PU-LH000101959/2021 | EPI_ISL_9272338 |
| hCoV-19/USA/IN-PU-LH000130564/2021 | EPI_ISL_9272339 |
| hCoV-19/USA/IN-PU-LH000143185/2021 | EPI_ISL_9272336 |
| hCoV-19/USA/IN-PU-LH000161550/2021 | EPI_ISL_9272321 |
| hCoV-19/USA/IN-PU-LH000116050/2021 | EPI_ISL_9272341 |
| hCoV-19/USA/IN-PU-LH000128241/2021 | EPI_ISL_9272317 |
| hCoV-19/USA/IN-PU-LH000111767/2021 | EPI_ISL_9272312 |
| hCoV-19/USA/IN-PU-LH000128194/2021 | EPI_ISL_9272315 |
| hCoV-19/USA/IN-PU-LH000111937/2021 | EPI_ISL_9272310 |
| hCoV-19/USA/IN-PU-LH000128469/2021 | EPI_ISL_9272311 |
| hCoV-19/USA/IN-PU-LH000155814/2021 | EPI_ISL_9272322 |
| hCoV-19/USA/IN-PU-LH000161626/2021 | EPI_ISL_9272320 |

|                                    |                 |
|------------------------------------|-----------------|
| hCoV-19/USA/IN-PU-LH000160817/2021 | EPI_ISL_9272309 |
| hCoV-19/USA/IN-PU-LH000165147/2021 | EPI_ISL_9272318 |
| hCoV-19/USA/IN-PU-LH000147291/2021 | EPI_ISL_9272314 |
| hCoV-19/USA/IN-PU-LH000161578/2021 | EPI_ISL_9272319 |
| hCoV-19/USA/IN-PU-LH000128236/2021 | EPI_ISL_9272313 |
| hCoV-19/USA/IN-PU-LH000105661/2021 | EPI_ISL_9272306 |
| hCoV-19/USA/IN-PU-LH000162079/2021 | EPI_ISL_9272316 |
| hCoV-19/USA/IN-PU-LH000180687/2021 | EPI_ISL_9272294 |
| hCoV-19/USA/IN-PU-LH000180757/2021 | EPI_ISL_9272297 |
| hCoV-19/USA/IN-PU-LH000185947/2021 | EPI_ISL_9272302 |
| hCoV-19/USA/IN-PU-LH000179713/2021 | EPI_ISL_9272293 |
| hCoV-19/USA/IN-PU-LH000101852/2021 | EPI_ISL_9272307 |
| hCoV-19/USA/IN-PU-LH000185918/2021 | EPI_ISL_9272305 |
| hCoV-19/USA/IN-PU-LH000168774/2021 | EPI_ISL_9272303 |
| hCoV-19/USA/IN-PU-LH000171923/2021 | EPI_ISL_9272299 |
| hCoV-19/USA/IN-PU-LH000190568/2021 | EPI_ISL_9272295 |
| hCoV-19/USA/IN-PU-LH000082742/2021 | EPI_ISL_9272304 |
| hCoV-19/USA/IN-PU-LH000184527/2021 | EPI_ISL_9272284 |
| hCoV-19/USA/IN-PU-LH000191089/2021 | EPI_ISL_9272291 |
| hCoV-19/USA/IN-PU-LH000171946/2021 | EPI_ISL_9272285 |
| hCoV-19/USA/IN-PU-Ih000145186/2021 | EPI_ISL_9272277 |
| hCoV-19/USA/IN-PU-Ih000109039/2021 | EPI_ISL_9272269 |
| hCoV-19/USA/IN-PU-Ih000124573/2021 | EPI_ISL_9272271 |
| hCoV-19/USA/IN-PU-Ih000080653/2021 | EPI_ISL_9272268 |
| hCoV-19/USA/IN-PU-Ih000110722/2021 | EPI_ISL_9272266 |
| hCoV-19/USA/IN-PU-Ih000101716/2021 | EPI_ISL_9272265 |
| hCoV-19/USA/IN-PU-Ih000101714/2021 | EPI_ISL_9272264 |

|                                    |                  |
|------------------------------------|------------------|
| hCoV-19/USA/IN-PU-Ih000094259/2021 | EPI_ISL_9272257  |
| hCoV-19/USA/IN-PU-Ih000145413/2021 | EPI_ISL_9272273  |
| hCoV-19/USA/IN-PU-LH000181022/2021 | EPI_ISL_10031346 |
| hCoV-19/USA/IN-PU-LH000178558/2021 | EPI_ISL_10031347 |
| hCoV-19/USA/IN-PU-Ih000080582/2021 | EPI_ISL_10031676 |
| hCoV-19/USA/IN-PU-LH000101699/2021 | EPI_ISL_10031677 |
| hCoV-19/USA/IN-PU-LH000122042/2021 | EPI_ISL_10031678 |

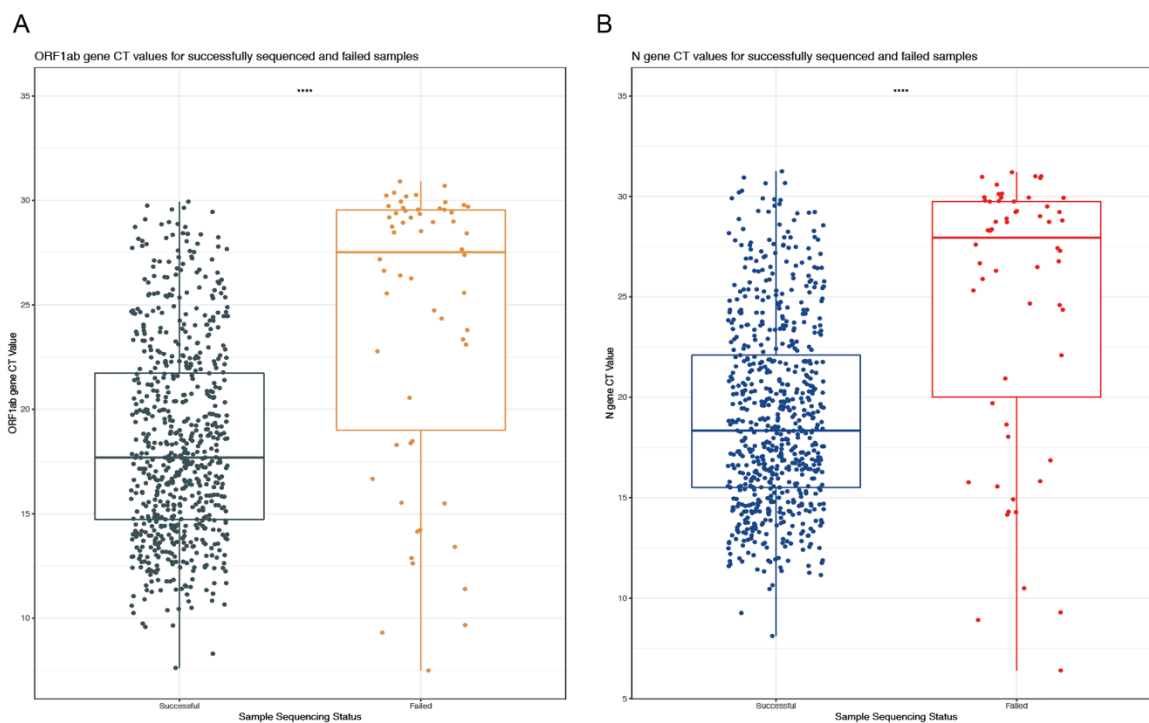

**Supplementary Figure 1.** Comparison of two SARS-CoV-2 genes targets of TaqPath RT-PCR for failed and successfully sequenced samples (A) Comparison of ORF1ab gene CT values among all samples that generated high or low-quality genomes. The first, second, and third quartiles are within the box, with the median line bolded. Samples are displayed as points with outliers included. P-values were generated using Wilcoxon rank-sum test and asterisks indicate P-value < 0.05 ( $p < 0.0001$ ). (B) Comparison of N gene CT values among all samples that generated high or low-quality genomes. (S gene CT values are not included as a third comparison from RT-PCR target because SGTF presence or value of 0 would greatly affect comparisons).



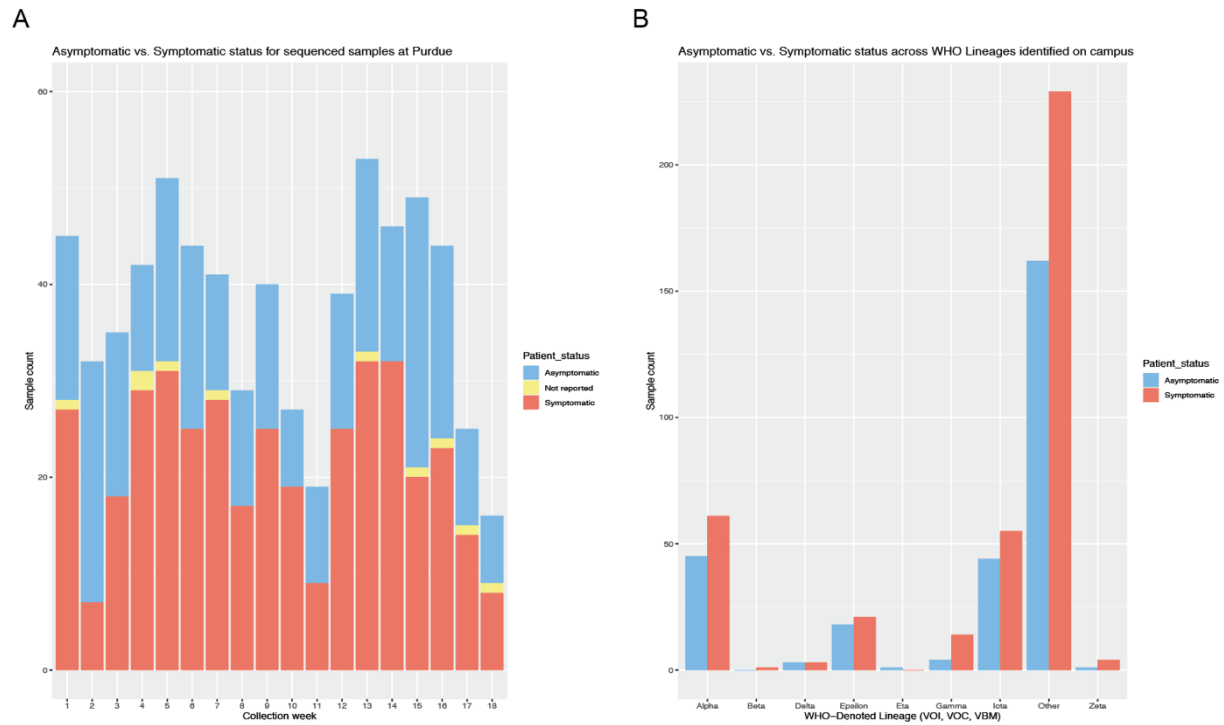

**Supplementary Figure 2.** Comparison of asymptomatic vs. symptomatic cases. (A) Barplot illustrating the distribution of asymptomatic vs. symptomatic patient status among sequenced cases across the 18-week study period. The x-axis displays collection weeks from January 3, 2021 to May 8, 2021, and the y-axis is the total sample count. (B) Barplot illustrating the distribution of asymptomatic vs. symptomatic patient status among sequenced cases by the WHO-identified lineages.

A

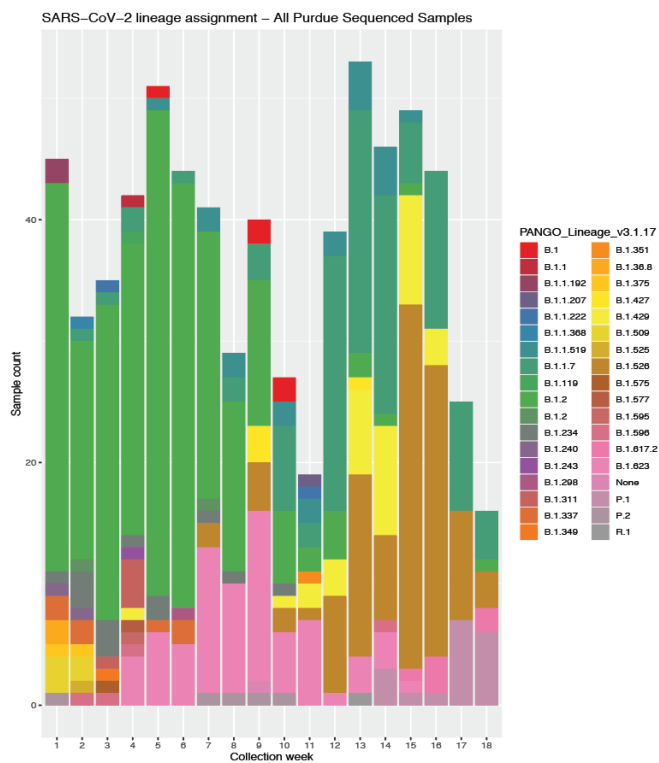

**Supplementary Figure 3.** Distribution of all SARS-CoV-2 variants on Purdue Campus. Barplot displays all identified SARS-CoV-2 variants from whole-genome sequenced samples each week from first week of January through the first week of May 2021. Each color represents a distinct variant as obtained from Pangolin version 3.1.17.
